# Supplementary material for: Si(SiMe3)2SiPh3 – a ligand for novel sub-valent tin cluster compounds
Source: Royal Society of Chemistry journal article supplement (doi:10.1039/c4dt02372b), 2014-01-01

## Supplementary electronic information for

# Si(SiMe<sub>3</sub>)<sub>2</sub>SiPh<sub>3</sub> – A Ligand for Novel Subvalent Tin Cluster

## Compounds

Raphael Klink, Claudio Schrenk and Andreas Schnepf

### 1.) NMR Spectra of Si(SiMe<sub>3</sub>)<sub>3</sub>(SiPh<sub>3</sub>) (2)

#### 1.1) <sup>1</sup>H-NMR (250 MHz, C<sub>6</sub>D<sub>6</sub>)

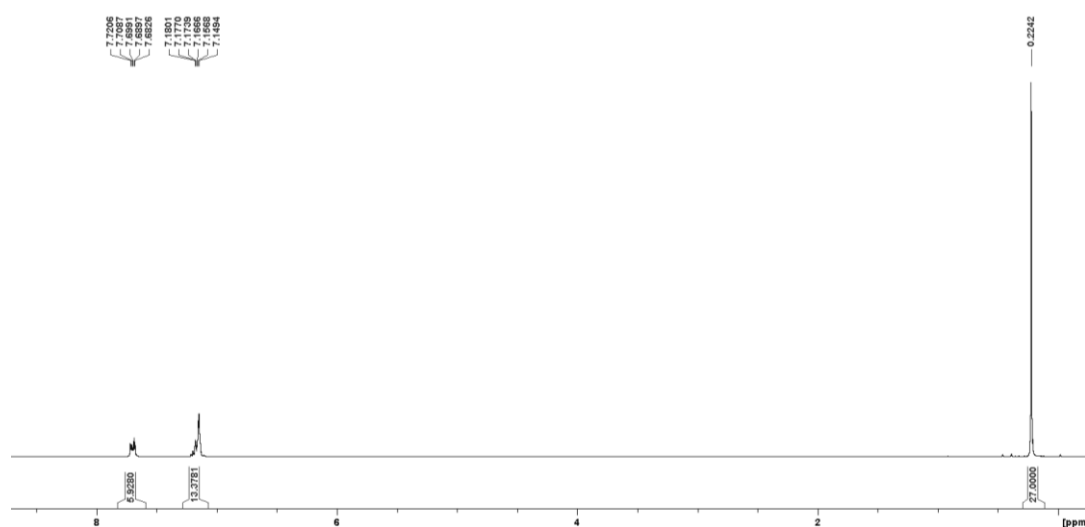

#### 1.2) <sup>13</sup>C{<sup>1</sup>H}-NMR (63 MHz, C<sub>6</sub>D<sub>6</sub>)

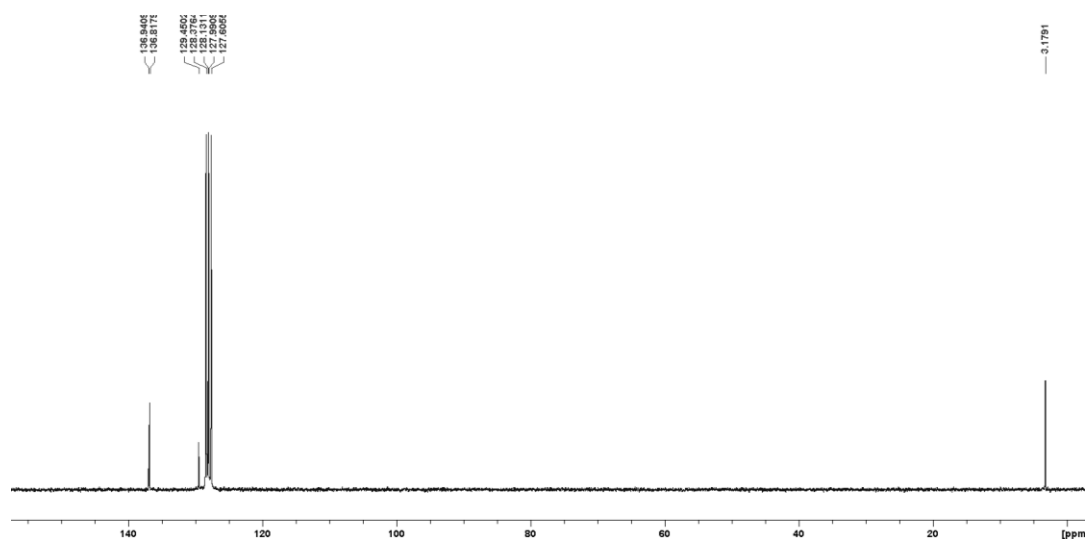

### 1.3) $^{29}\text{Si}$ -NMR (50 MHz, $\text{C}_6\text{D}_6$ )

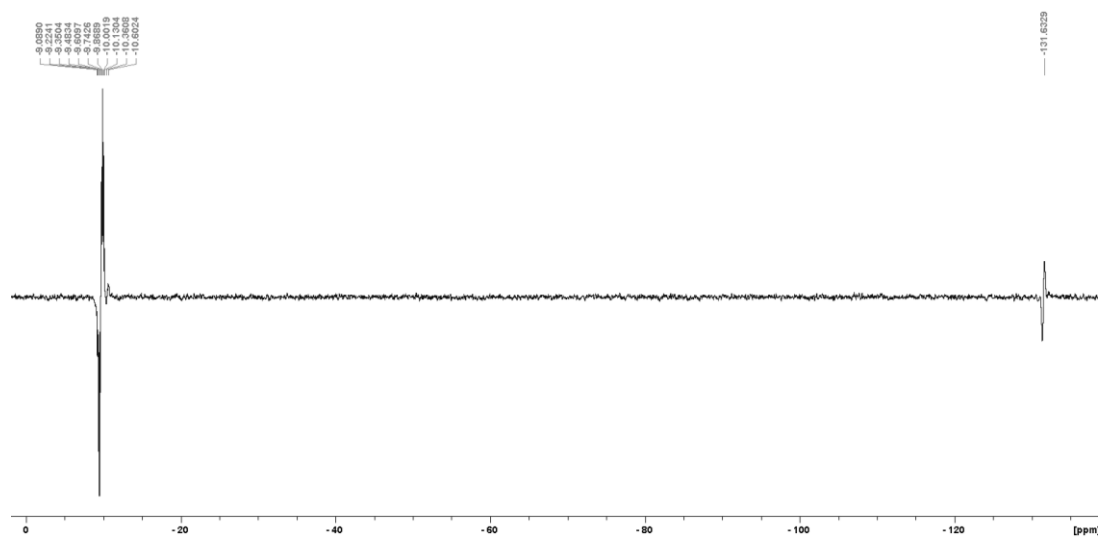

## 2.) NMR spectra of $\text{KSi}(\text{SiMe}_3)_2(\text{SiPh}_3) \cdot \text{thf}$ (**3K**)

### 2.1) $^1\text{H}$ -NMR (250 MHz, $\text{C}_6\text{D}_6$ )

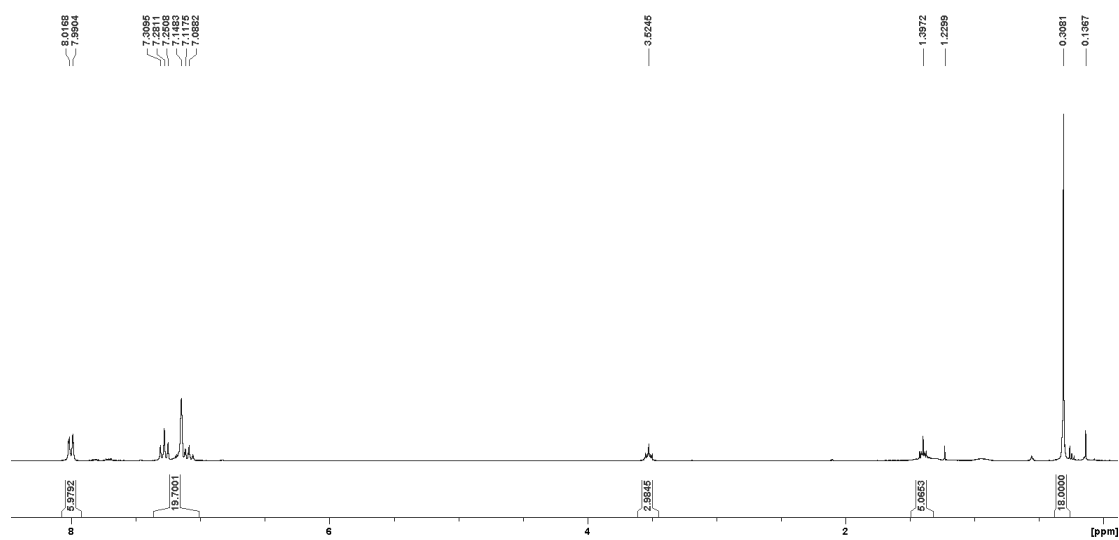

## 2.2) $^{13}\text{C}\{^1\text{H}\}$ -NMR (63 MHz, $\text{C}_6\text{D}_6$ )

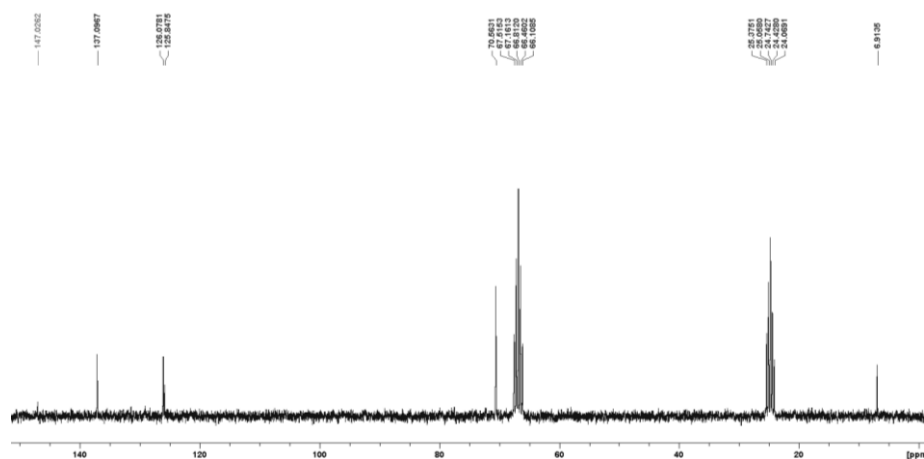

## 3.) NMR spectra of (18-crown-6) $\text{KSi}(\text{SiMe}_3)_2(\text{SiPh}_3)$ ( $3_{\text{KC}}$ )

### 3.1) $^1\text{H}$ -NMR (250 MHz, $\text{thf-d}_8$ )

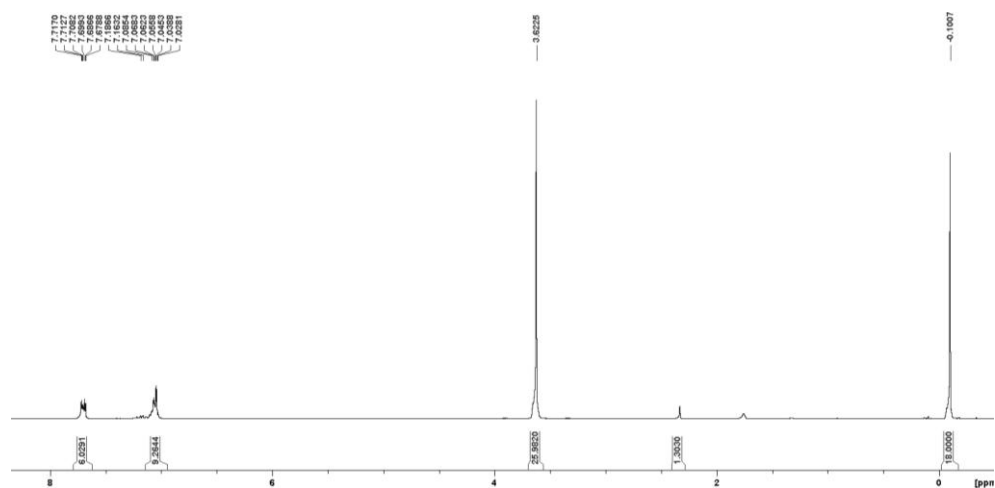

### 3.2) $^{13}\text{C}\{^1\text{H}\}$ -NMR (63 MHz, $\text{thf-d}_8$ )

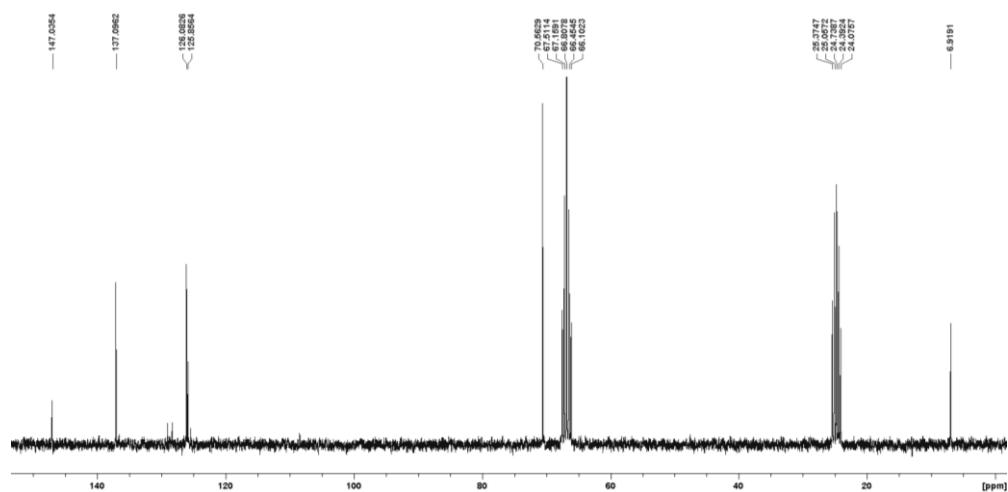

### 3.3) $^{29}\text{Si}\{^1\text{H}\}$ -NMR (50 MHz, thf- $d_8$ )

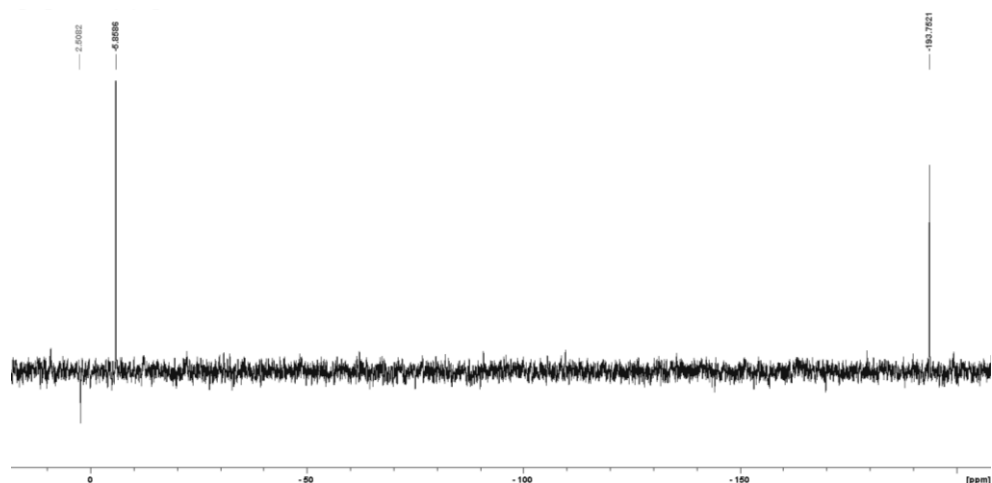

## 4.) NMR spectra of $\text{LiSi}(\text{SiMe}_3)_2(\text{SiPh}_3) \cdot 3 \text{ thf}$ ( $3\text{Li}$ )

### 4.1) $^1\text{H}$ -NMR (250 MHz, $\text{C}_6\text{D}_6$ )

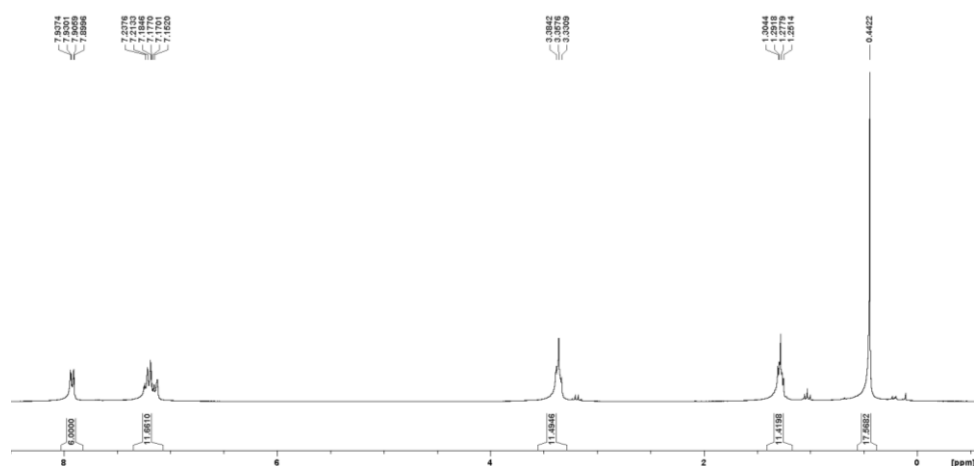

### 4.2) $^{13}\text{C}\{^1\text{H}\}$ -NMR (63 MHz, $\text{C}_6\text{D}_6$ )

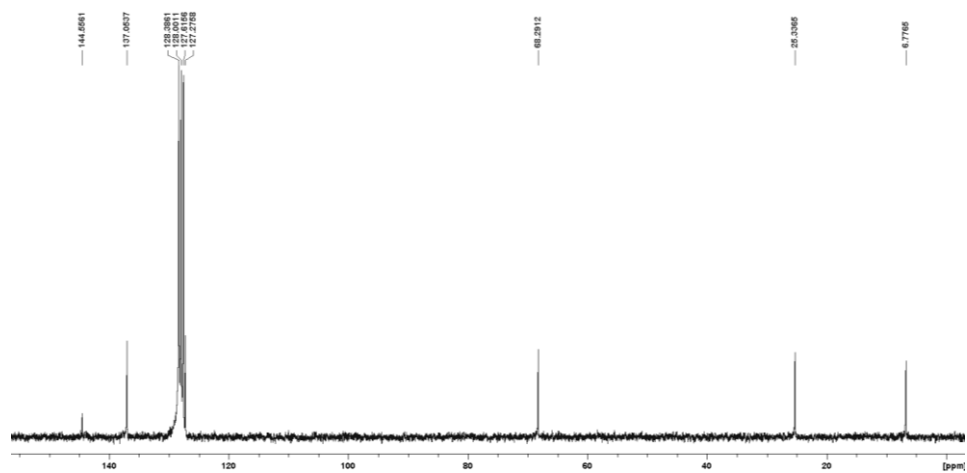

### 4.3) $^{29}\text{Si}$ -NMR (50 MHz, $\text{C}_6\text{D}_6$ )

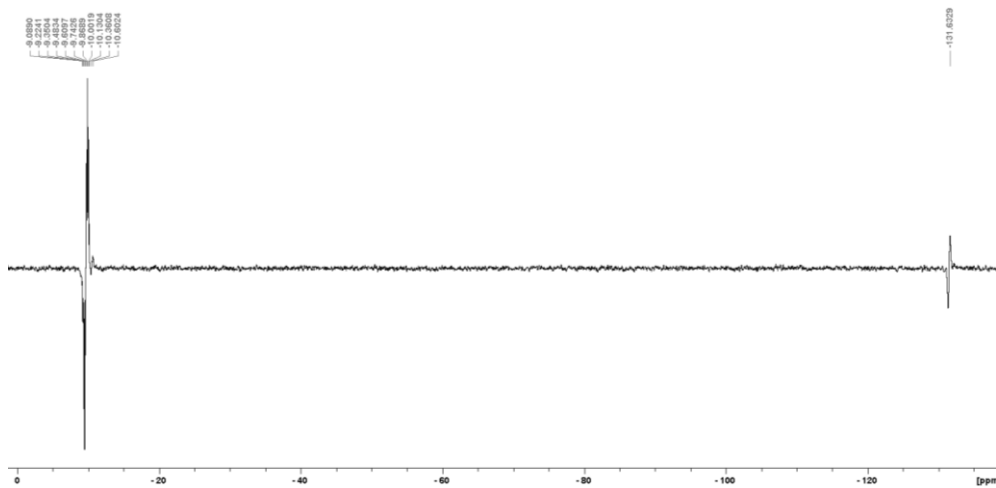

## 5.) NMR spectra of (18-crown-6)KSn[Si(SiMe<sub>3</sub>)<sub>2</sub>(SiPh<sub>3</sub>)<sub>2</sub>]Cl (4)

### 5.1) $^1\text{H}$ -NMR (250 MHz, $\text{C}_6\text{D}_6$ )

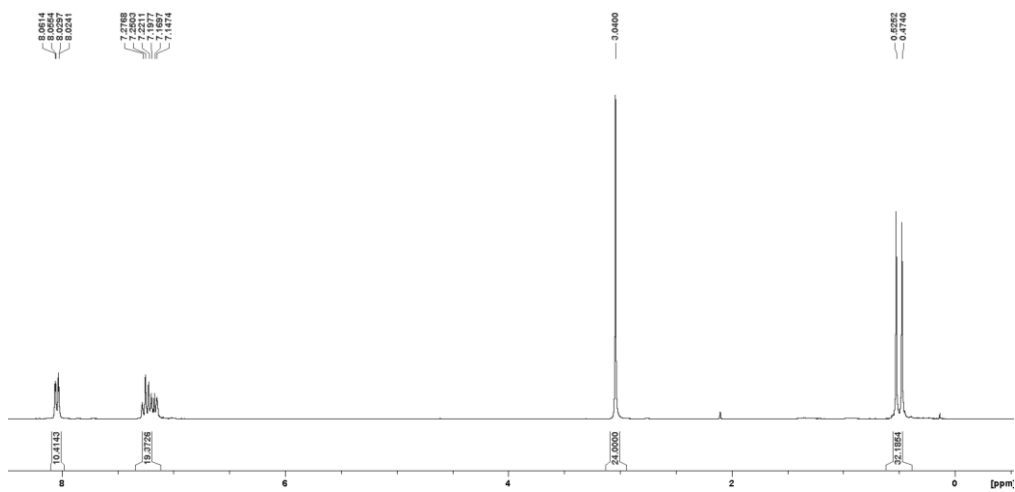

### 5.2) $^{13}\text{C}\{^1\text{H}\}$ -NMR (63 MHz, $\text{C}_6\text{D}_6$ )

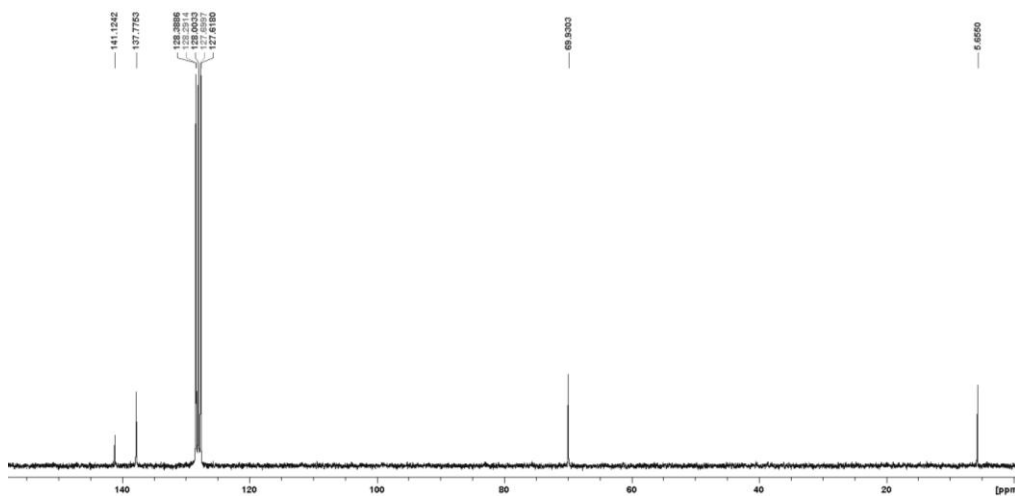

### 5.3) $^{29}\text{Si}$ -NMR (50 MHz, $\text{C}_6\text{D}_6$ )

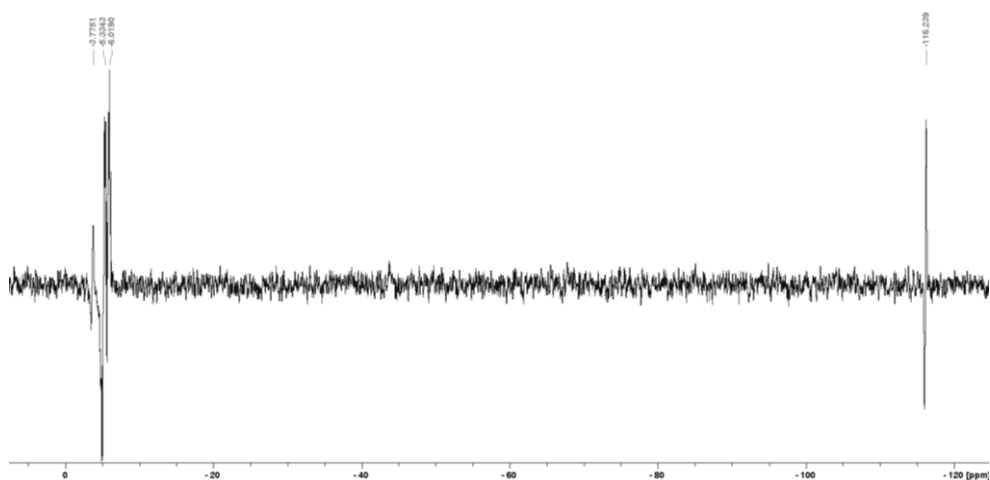

### 5.4) $^{119}\text{Sn}$ -NMR (93 MHz, $\text{C}_6\text{D}_6$ )

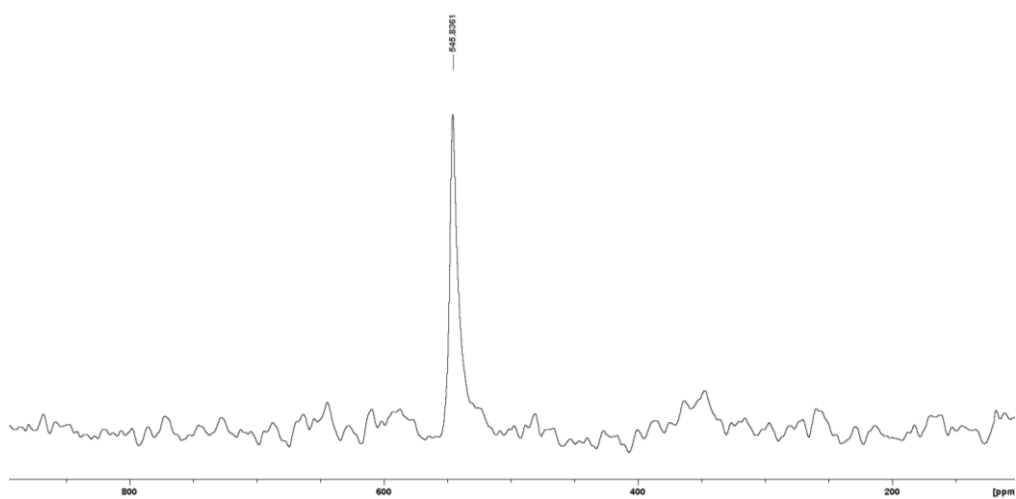

## 6.) NMR spectra of $(\text{tmeda})_2\text{LiSn}[\text{Si}(\text{SiMe}_3)_2(\text{SiPh}_3)]_2\text{Cl}$ (6)

### 6.1) $^1\text{H}$ -NMR (250 MHz, $\text{C}_6\text{D}_6$ )

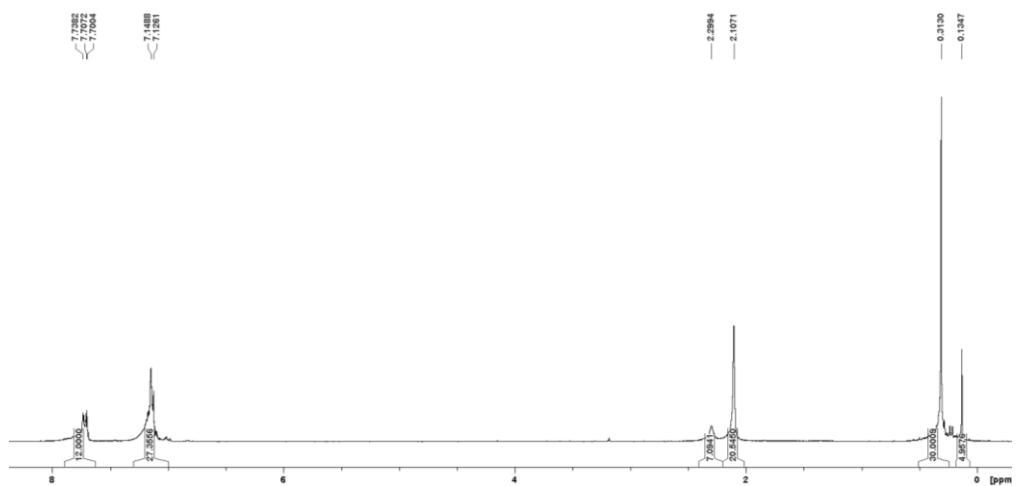

6.2)  $^{13}\text{C}\{^1\text{H}\}$ -NMR (63 MHz,  $\text{C}_6\text{D}_6$ )

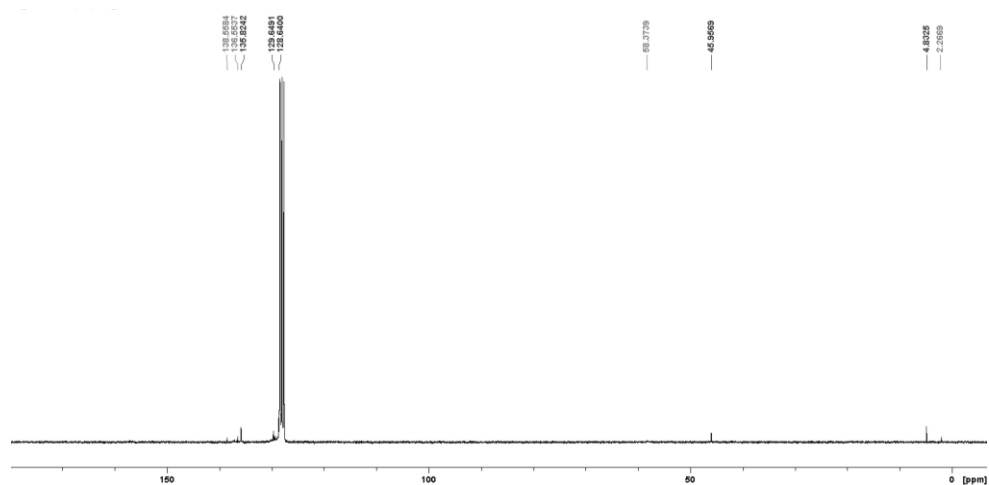

6.3)  $^{29}\text{Si}$ -NMR (50 MHz,  $\text{C}_6\text{D}_6$ )

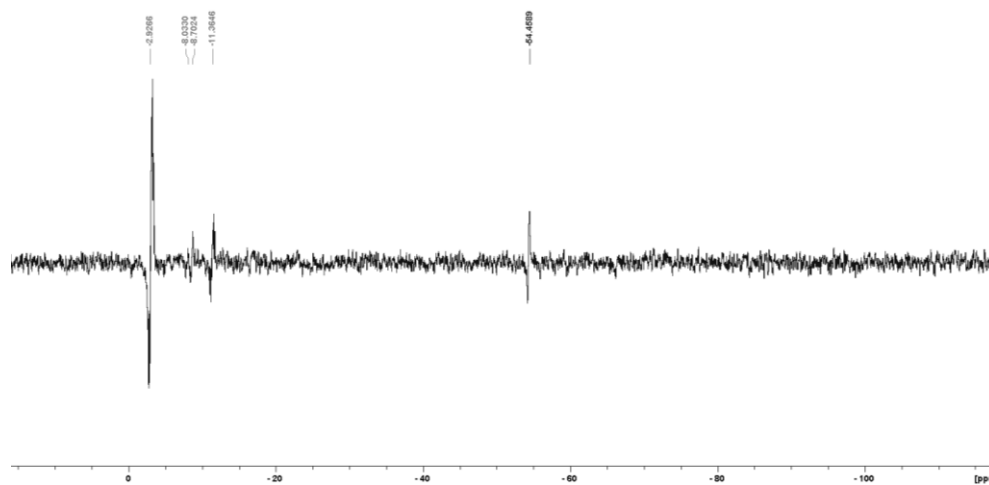

7.)  $^1\text{H-NMR}$  Spectra of the crude reaction mixture of the reaction of  $3_{\text{K}}$  with  $\text{SnCl}_2$  (the signals of the stannide **4** are emphasized by an ellipse).

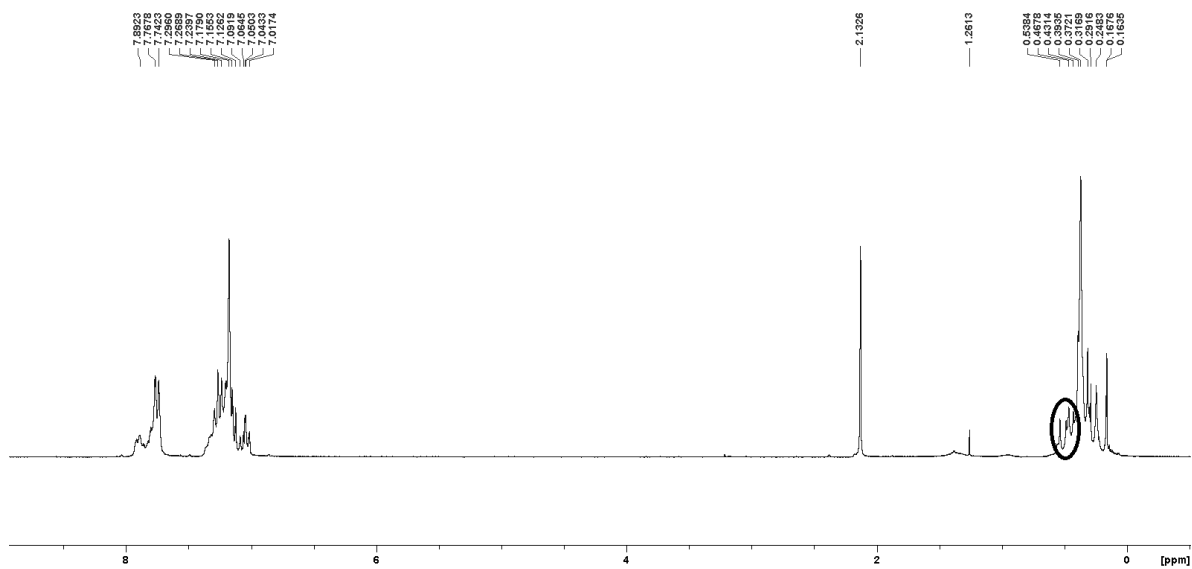

Supplement: c4dt02372b1.pdf [file c4dt02372b1.pdf]
